# Supplementary material for: Biosynthesis of triacsin featuring an N-hydroxytriazene pharmacophore
Source: Springer Nature journal article supplement (doi:10.1038/s41589-021-00895-3), 2021-11-01
Supplement: 41589_2021_895_MOESM9_ESM.mol [file 41589_2021_895_MOESM9_ESM.mol]

nchembio.A210513082B-comp5.mol
  ChemDraw09012123472D

 18 17  0  0  0  0  0  0  0  0999 V2000
   -3.5676   -0.2108    0.0000 C   0  0  0  0  0  0  0  0  0  0  0  0
   -4.2814   -0.6231    0.0000 C   0  0  0  0  0  0  0  0  0  0  0  0
    4.2914   -0.6231    0.0000 N   0  0  0  0  0  0  0  0  0  0  0  0
    3.5776   -0.2108    0.0000 N   0  0  0  0  0  0  0  0  0  0  0  0
    5.0060   -0.2108    0.0000 N   0  0  0  0  0  0  0  0  0  0  0  0
    5.7206   -0.6231    0.0000 O   0  0  0  0  0  0  0  0  0  0  0  0
   -2.8530   -0.6231    0.0000 C   0  0  0  0  0  0  0  0  0  0  0  0
   -2.1384   -0.2108    0.0000 C   0  0  0  0  0  0  0  0  0  0  0  0
   -1.4238   -0.6231    0.0000 C   0  0  0  0  0  0  0  0  0  0  0  0
   -0.7092   -0.2108    0.0000 C   0  0  0  0  0  0  0  0  0  0  0  0
    0.0054   -0.6231    0.0000 C   0  0  0  0  0  0  0  0  0  0  0  0
    0.7192   -0.2108    0.0000 C   0  0  0  0  0  0  0  0  0  0  0  0
    1.4338   -0.6231    0.0000 C   0  0  0  0  0  0  0  0  0  0  0  0
    2.1484   -0.2108    0.0000 C   0  0  0  0  0  0  0  0  0  0  0  0
    2.8630   -0.6231    0.0000 C   0  0  0  0  0  0  0  0  0  0  0  0
   -5.0014   -0.2077    0.0000 C   0  0  0  0  0  0  0  0  0  0  0  0
   -5.7206   -0.6231    0.0000 O   0  0  0  0  0  0  0  0  0  0  0  0
   -5.0014    0.6231    0.0000 O   0  0  0  0  0  0  0  0  0  0  0  0
  1  2  2  0      
  3  4  1  0      
  3  5  2  0      
  5  6  1  0      
  1  7  1  0      
  7  8  2  0      
  8  9  1  0      
  9 10  2  0      
 10 11  1  0      
 11 12  2  0      
 12 13  1  0      
 13 14  2  0      
 14 15  1  0      
 15  4  2  0      
  2 16  1  0      
 16 17  1  0      
 16 18  2  0      
M  END
